# Supplementary material for: A new adsorption energy-barrier relation and its application to CO2 hydrogenation to methanol over In2O3-supported metal catalysts
Source: Royal Society of Chemistry journal article supplement (doi:10.1039/d2cc05571f), 2022-12-19
Supplement: d2cc05571f1.pdf [file d2cc05571f1.pdf]

1  
2  
3  
4  
5  
6  
7  
8  
9  
10  
11  
12  
13  
14  
15  
16  
17  
18  
19  
20  
21  
22  
23  
24  
25  
26  
27  
28  
29  
30  
31  
32  
33  
34

## Supplementary Information

### A New Adsorption Energy-Barrier Relation and Its Application to CO<sub>2</sub> Hydrogenation to Methanol over In<sub>2</sub>O<sub>3</sub>-Supported Metal Catalysts

Deshuai Yang,<sup>1,2</sup> Huili Lu,<sup>1</sup> Guixiang Zeng,<sup>\*2</sup> Zhao-Xu Chen,<sup>\*1</sup>

<sup>1</sup>*Institute of Theoretical and Computational Chemistry, School of Chemistry and Chemical  
Engineering, Nanjing University, Nanjing 210023, People's Republic of China*

<sup>2</sup>*Kuang Yaming Honors School and Institute for Brain Sciences, Nanjing University, Nanjing  
210023, People's Republic of China*

---

E-mail: [zxchen@nju.edu.cn](mailto:zxchen@nju.edu.cn); [gxzeng@nju.edu.cn](mailto:gxzeng@nju.edu.cn)

1 **Models and Computational Methodology:**

2 The In<sub>2</sub>O<sub>3</sub>-supported metal catalysts were modeled with M<sub>4</sub>/In<sub>2</sub>O<sub>3</sub> (110)<sup>S1</sup>  
3 (M= Ni, Ag, Pt, Rh, Ir and Pd) (Fig. S1a-f). The In<sub>2</sub>O<sub>3</sub> (110) surface was modeled  
4 with a four-layer slab of (1×√2) surface unit cell constructed from the  
5 optimized cubic bulk In<sub>2</sub>O<sub>3</sub> with the lattice parameter of 10.22 Å, which is in  
6 agreement with the experimental result.<sup>S2</sup> A vacuum of ~14 Å was adopted  
7 and the cell has a dimension of 10.22 Å × 14.45 Å × 20.00 Å, consisting of 32  
8 Indium atoms and 48 Oxygen atoms.

9 All DFT calculations were carried out using the Vienna *Ab initio* Simulation Package  
10 (VASP).<sup>S3</sup> The projector-augment wave (PAW) method<sup>S4</sup> and Generalized gradient  
11 approximation (GGA) with Perdew-Burke-Ernzerhoff (PBE) functional<sup>S5</sup> were  
12 employed to describe the electron-ion interaction and exchange-correlation  
13 interaction, respectively. The plane-wave energy cutoff was set to 400 eV and DFT-D3  
14 method<sup>S6</sup> implemented in VASP was adopted to evaluate the Van der Waals (vdW)  
15 interaction. The Brillouin zone was sampled using a (2×2×1) k-point grid according to  
16 the Monkhorst Pack method.<sup>S7</sup> Test calculations of CO<sub>2</sub> adsorption energy on  
17 Ni<sub>4</sub>/In<sub>2</sub>O<sub>3</sub>(110) indicate that the error with 400 eV cutoff energy and (2×2×1) k-point  
18 is within chemical accuracy (1 kcal/mol). Spin-polarized effects were considered.  
19 Geometry optimization was stopped when the force on each relaxed atom is no more  
20 than 0.02 eV/Å. The transition states (TSs) were located using the climbing image  
21 nudged elastic band (CI-NEB) method.<sup>S8</sup> All the located stationary points are  
22 characterized by frequency analysis with each transition state has one and only one  
23 imaginary frequency along the reaction coordinate, and initial and final states have  
24 no imaginary frequencies.

25

26

27

28 **Microkinetics modeling:**

29 For surface reactions, the forward and backward rate constants were determined  
30 used the Eyring equation:<sup>S9</sup>

$$k = \frac{k_b T}{h} \frac{Q_T}{Q} e^{-E_a/k_b T} \quad (1)$$

Where  $k$  is the reaction rate constants (in  $s^{-1}$ ),  $k_b$  and  $h$  are the Boltzmann and Planck's constants, respectively.  $T$  and  $E_a$  are the reaction temperature (in K) and energy barrier, respectively.  $Q_T$  and  $Q$  are the partition function of the transition state and initial or final state, respectively.

For the molecular adsorption, we assumed that the molecule loses one of its translational degrees of freedom with respect to the gas phase. The changes of the rotational degree of freedom were neglected. Then, the adsorption rate constant  $k_{ads}$  was calculated as:<sup>S10</sup>

$$k_{ads} = \frac{PA'}{\sqrt{2\pi mk_b T}} S \quad (2)$$

Where  $P$  indicates the partial pressure of the adsorbate in the gas phase,  $A'$  refers to the surface area of the adsorption site,  $S$  and  $m$  represent the sticking coefficient and the mass of the adsorbate, respectively. The sticking coefficients for  $CO_2$  and  $H_2$  were set to 1.

For the desorption process, we assumed that the activated complex has three rotational degree of freedom and two translation degree of freedom. According, the desorption rate constant  $k_{des}$  can be defined as:<sup>S10</sup>

$$k_{des} = \frac{k_b T^3}{h^3} \frac{A' (2\pi mk_b)}{\sigma \theta_{rot}} e^{-E_{des}/k_b T} \quad (3)$$

Where  $\sigma$  and  $\theta$  represent the symmetry number and the characteristic temperature for rotation, respectively.  $E_{des}$  is the desorption energy.

Different equations for all surface reaction species were constructed by using the rate constants of the elementary reaction steps. For each of the  $X$  components involved in the reaction network, a single differential equation is defined as:

$$r_i = \sum_{j=1}^N \left( k_j v_i^j \prod_{k=1}^X c_k^{v_k^j} \right) \quad (4)$$

Where  $k_j$  is the elementary reaction rate constant,  $v_i^j$  is the stoichiometric coefficient of component  $i$  in elementary step  $k$ , and  $c_k$  refers to the concentration of component  $k$  on catalyst surface.

To identify the rate-determining step of the  $CO_2$  hydrogenation reaction, Campbell's degree of rate control (DRC) analysis was employed.<sup>S11</sup> To a specific elementary step  $i$ , the DRC coefficient ( $\chi_{RC,i}$ ) is defined as:

$$\chi_{RC,i} = \frac{k_i}{r} \left( \frac{\partial r}{\partial k_i} \right)_{k_{j \neq i}, K_i} = \left( \frac{\partial \ln r}{\partial \ln k_i} \right)_{k_{j \neq i}, K_i} \quad (5)$$

1 Where  $k_i$ ,  $K_i$  and  $r$  refer to the rate constant, equilibrium constant for step  $i$ , and  
 2 the overall reaction rate, respectively. A positive value of  $\chi_{RC,i}$  indicates a  
 3 rate-controlling step, while a negative value indicates inhibition. Additionally, DRC  
 4 coefficients obey the sum rule and the sum of all  $\chi_{RC,i}$  values equals to unity.

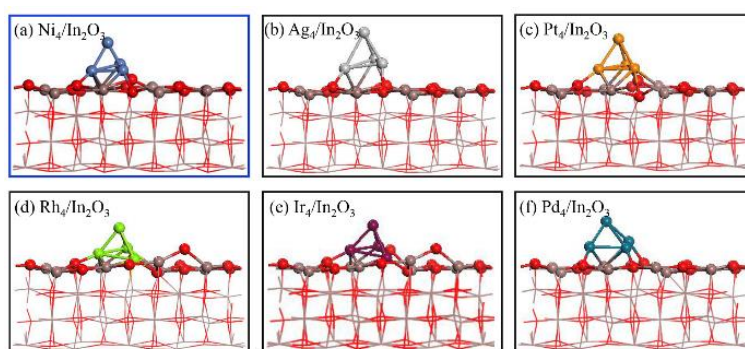

8  
 9 **Fig. S1** Optimized structures of (a) Ni<sub>4</sub>/In<sub>2</sub>O<sub>3</sub>(110), (b) Ag<sub>4</sub>/In<sub>2</sub>O<sub>3</sub>(110), (c)  
 10 Pt<sub>4</sub>/In<sub>2</sub>O<sub>3</sub>(110), (d) Rh<sub>4</sub>/In<sub>2</sub>O<sub>3</sub>(110), (e) Ir<sub>4</sub>/In<sub>2</sub>O<sub>3</sub>(110) and (g) Pd<sub>4</sub>/In<sub>2</sub>O<sub>3</sub>(110). Red, O  
 11 atoms; Brown, In atoms; Blue, Ni atoms; Gray, Ag atoms; Orange, Pt atoms; Green, Rh  
 12 atoms; Purple, Ir atoms; Cyan, Pd atoms.

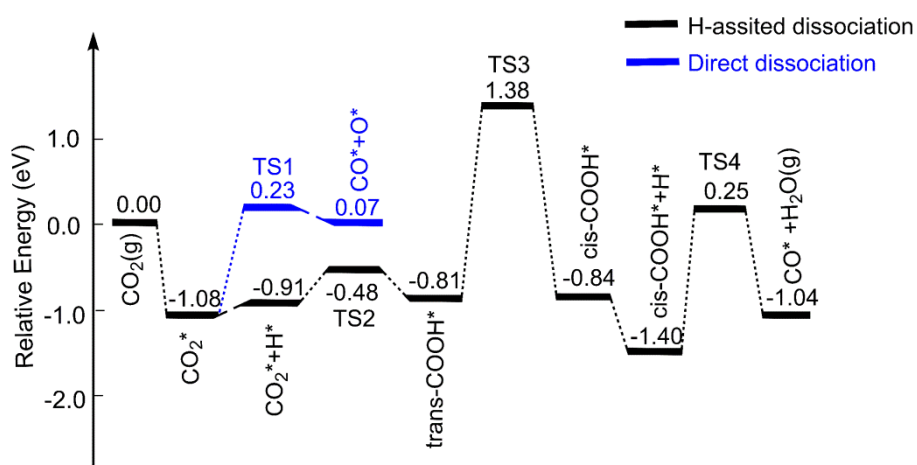

18  
 19 **Fig. S2** Comparison of two routes of CO formation over Ni<sub>4</sub>/In<sub>2</sub>O<sub>3</sub>(110) for the RWGS route.

20  
 21

1  
2  
3  
4

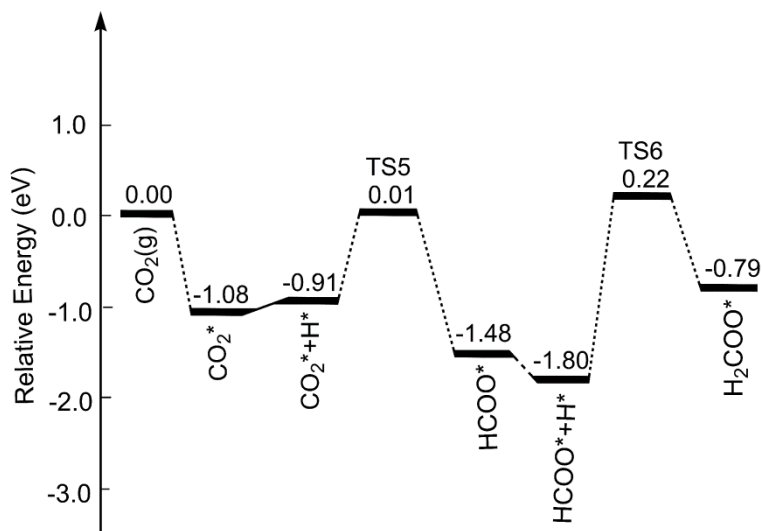

5  
6  
7  
8  
9  
10  
11  
12

**Fig. S3** Potential energy profiles of H<sub>2</sub>COO over Ni<sub>4</sub>/In<sub>2</sub>O<sub>3</sub>(110) for the formate route.

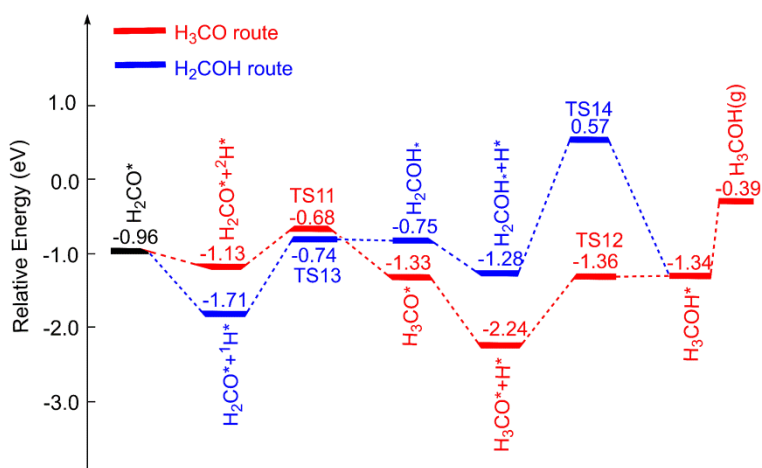

13  
14  
15  
16  
17  
18

**Fig. S4** Comparison of H<sub>3</sub>CO and H<sub>2</sub>COH routes for H<sub>2</sub>CO\* hydrogenation to methanol over Ni<sub>4</sub>/In<sub>2</sub>O<sub>3</sub>(110) for the formic acid (HCOOH) route.

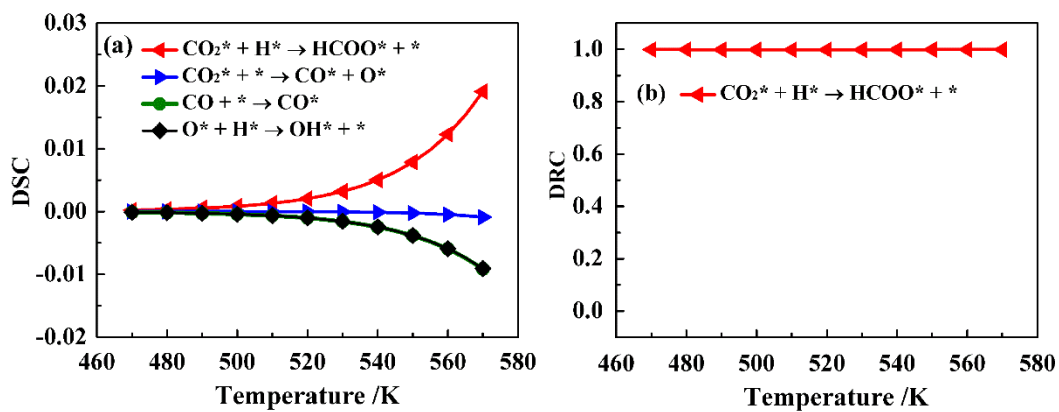

1  
2  
3 **Fig. S5** Calculated (a) the degree of selectivity control (DSC) and (b) the degree of rate  
4 control (DRC) of methanol as a function of temperature based on microkinetic  
5 simulations (reaction conditions:  $\text{CO}_2:\text{H}_2 = 1:4$ ,  $p = 50$  bar).

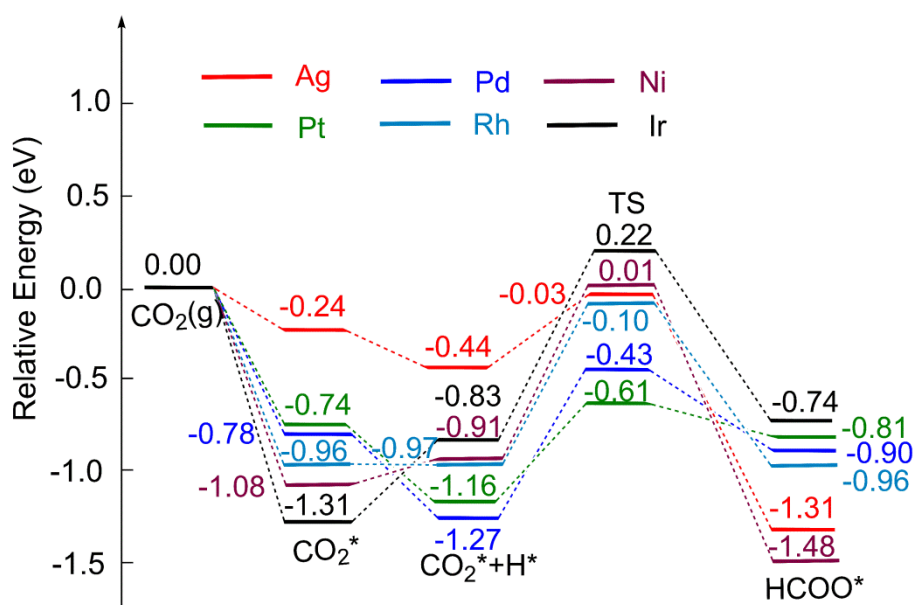

12  
13  
14 **Fig. S6** Potential energy profiles for  $\text{CO}_2$  hydrogenation to  $\text{HCOO}$  over  $\text{M}_4/\text{In}_2\text{O}_3(110)$ , where  
15  $\text{M} = \text{Ag}, \text{Pt}, \text{Pd}, \text{Rh}, \text{Ni}$  and  $\text{Ir}$ .

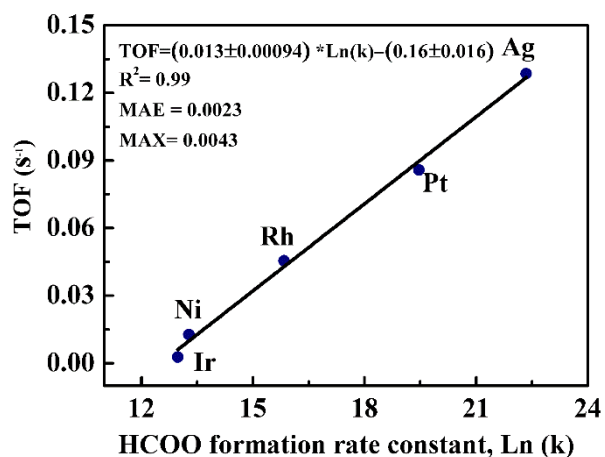

1  
2  
3  
4  
5  
6  
7  
8  
9  
10

**Fig. S7** Linear scaling correlation between logarithm of the HCOO formation rate constant, Ln(k), and the experimental turnover frequency (TOF) of methanol.

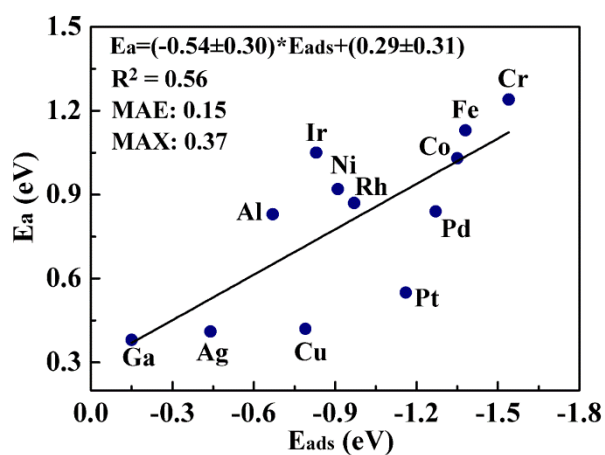

11  
12  
13  
14  
15  
16  
17  
18  
19

**Fig. R8** Relationship between the co-adsorption energies ( $E_{ads}$ ) of  $CO_2^* + H^*$  and the energy barriers ( $E_a$ ) for  $CO_2$  hydrogenation to HCOO step over  $In_2O_3$  surface.

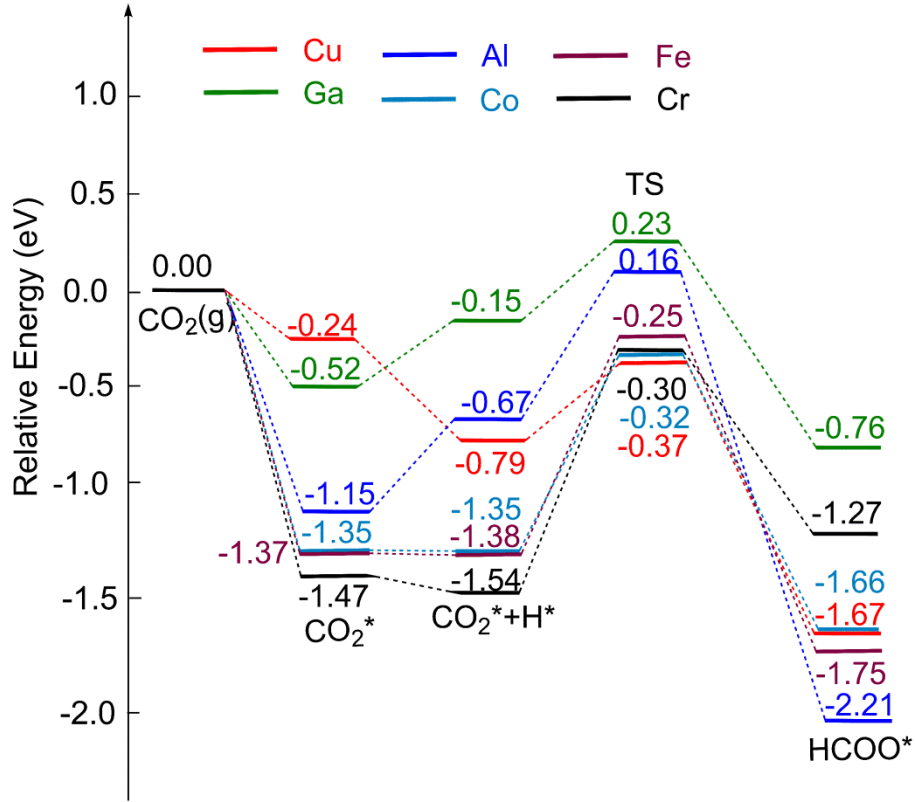

1

2 **Fig. S9** Potential energy profiles for CO<sub>2</sub> hydrogenation to HCOO over M<sub>4</sub>/In<sub>2</sub>O<sub>3</sub>(110), where  
 3 M = Cu, Ga, Al, Co, Fe and Cr.

4

5 **Table S1.** Calculated forward ( $E_f$ )/backward ( $E_b$ ) energy barriers and the corresponding  
 6 pre-exponential factors ( $A_f$  and  $A_r$ ) of the elementary reactions involved in CO<sub>2</sub> hydrogenation  
 7 to methanol over Ni<sub>4</sub>/In<sub>2</sub>O<sub>3</sub>(110). Pre-exponential factors are temperature dependent and  
 8 are given here at a temperature of 300 °C.

| Elementary Step                                         | Ni <sub>4</sub> /In <sub>2</sub> O <sub>3</sub> |            |                          |                          |
|---------------------------------------------------------|-------------------------------------------------|------------|--------------------------|--------------------------|
|                                                         | $E_f$ (eV)                                      | $E_b$ (eV) | $A_f$ (s <sup>-1</sup> ) | $A_b$ (s <sup>-1</sup> ) |
| R1: CO <sub>2</sub> * + * → CO* + O*                    | 1.31                                            | 0.16       | 7.28E+13                 | 8.50E+12                 |
| R2: CO <sub>2</sub> * + H* → trans-COOH* + *            | 0.43                                            | 0.33       | 4.16E+12                 | 7.31E+12                 |
| R3: trans-COOH* → cis-COOH*                             | 2.19                                            | 2.22       | 3.86E+13                 | 5.68E+13                 |
| R4: cis-COOH* + H* → CO* + H <sub>2</sub> O*            | 1.65                                            | 1.29       | 1.13E+13                 | 1.00E+14                 |
| R5: CO <sub>2</sub> * + H* → HCOO* + *                  | 0.92                                            | 1.49       | 5.07E+13                 | 1.59E+14                 |
| R6: HCOO* + H* → H <sub>2</sub> COO* + *                | 2.02                                            | 1.01       | 4.80E+12                 | 6.77E+12                 |
| R7: HCOO* + H* → HCOOH* + *                             | 0.76                                            | -0.02      | 1.68E+13                 | 4.95E+12                 |
| R8: HCOOH* + * → HCO* + OH*                             | 0.77                                            | 0.71       | 1.65E+12                 | 1.40E+12                 |
| R9: HCO* + OH* + H* → HCO* + * + H <sub>2</sub> O*      | 0.59                                            | 0.56       | 4.63E+12                 | 3.96E+12                 |
| R10: HCO* + H* → H <sub>2</sub> CO* + *                 | 0.44                                            | 0.58       | 1.00E+13                 | 6.31E+12                 |
| R11: H <sub>2</sub> CO* + H* → H <sub>3</sub> CO* + *   | 0.45                                            | 0.65       | 7.26E+12                 | 1.24E+12                 |
| R12: H <sub>3</sub> CO* + H* → H <sub>3</sub> COH* + *  | 0.88                                            | -0.02      | 9.38E+11                 | 2.83E+12                 |
| R13: H <sub>2</sub> CO* + H* → H <sub>2</sub> COH* + *  | 0.98                                            | 0.01       | 4.47E+12                 | 2.71E+12                 |
| R14: H <sub>2</sub> COH* + H* → H <sub>3</sub> COH* + * | 1.85                                            | 1.83       | 2.00E+13                 | 2.97E+12                 |



1 **Table S2.** Experimental turnover frequencies (TOFs) of methanol and relevant information for  
 2 the six reported In<sub>2</sub>O<sub>3</sub>-supported metal catalysts for CO<sub>2</sub> hydrogenation to methanol.

3

| Species | Metal loading (wt%) | Relative atomic mass (g/mol) | Space Time Yield of methanol STY, (g <sub>MeOH</sub> g <sub>cat</sub> <sup>-1</sup> h <sup>-1</sup> ) | TOF (s <sup>-1</sup> ) | Ref |
|---------|---------------------|------------------------------|-------------------------------------------------------------------------------------------------------|------------------------|-----|
| Ag      | 0.33                | 107.87                       | 0.4530                                                                                                | 1.29E-01               | S12 |
| Pd      | 0.97                | 106.42                       | 0.8900                                                                                                | 8.48E-02               | S13 |
| Rh      | 1.07                | 102.91                       | 0.5448                                                                                                | 4.55E-02               | S14 |
| Ir      | 10.00               | 192.22                       | 0.7650                                                                                                | 1.28E-02               | S15 |
| Ni      | 10.00               | 58.69                        | 0.5500                                                                                                | 2.80E-03               | S16 |
| Pt      | 1.07                | 195.08                       | 0.5420                                                                                                | 8.58E-02               | S17 |

4

5

6 **Table S3.** Calculated forward energy barriers ( $E_f$ ), pre-exponential factor ( $A_f$ ) and reaction  
 7 rate constant  $k_r$  for CO<sub>2</sub>\* + H\* → HCOO\* + \* step over M<sub>4</sub>/In<sub>2</sub>O<sub>3</sub> (110), where M = Ag, Pt, Rh,  
 8 Ni and Ir respectively. Pre-exponential factors and reaction rates are temperature dependent  
 9 and are given here at a temperature of 300 °C.

10

| Species | $E_f$ (eV) | $A_f$ (s <sup>-1</sup> ) | $k_r$ (s <sup>-1</sup> ) |
|---------|------------|--------------------------|--------------------------|
| Ag      | 0.40       | 1.78E+13                 | 5.07E+09                 |
| Pt      | 0.54       | 1.75E+13                 | 2.84E+08                 |
| Rh      | 0.87       | 3.48E+14                 | 7.55E+06                 |
| Ni      | 0.92       | 5.07E+13                 | 4.33E+05                 |
| Ir      | 1.05       | 1.04E+15                 | 5.83E+05                 |

11

12

13 **Table S4.** Calculated Bader charges (in unit |e|) and CO<sub>2</sub> adsorption energies ( $E_{ads}$ ).

| System | CO <sub>2</sub> | O <sub>1</sub> | O <sub>2</sub> | C    | M <sub>t</sub> | M1   | M2   | M3    | M4   | In   | $E_{ads}$ |
|--------|-----------------|----------------|----------------|------|----------------|------|------|-------|------|------|-----------|
| Ag     | -0.03           | -1.06          | -1.10          | 2.12 | 0.71           | 0.24 | 0.24 | 0.01  | 0.22 | 1.54 | -0.24     |
| Pt     | -0.58           | -0.97          | -1.06          | 1.45 | 0.54           | 0.20 | 0.09 | 0.14  | 0.11 | 1.62 | -0.73     |
| Pd     | -0.55           | -1.00          | -1.07          | 1.52 | 0.64           | 0.23 | 0.09 | 0.19  | 0.14 | 1.62 | -0.79     |
| Rh     | -0.64           | -1.02          | -1.08          | 1.46 | 0.90           | 0.28 | 0.18 | 0.22  | 0.21 | 1.62 | -0.96     |
| Ni     | -0.70           | -1.04          | -1.07          | 1.41 | 1.11           | 0.34 | 0.27 | 0.27  | 0.24 | 1.62 | -1.08     |
| Ir     | -0.53           | -0.97          | -1.11          | 1.55 | 0.71           | 0.23 | 0.13 | 0.18  | 0.18 | 1.60 | -1.31     |
| Cr     | -0.96           | -1.06          | -1.08          | 1.18 | 2.18           | 0.59 | 0.53 | 0.50  | 0.56 | 1.61 | -1.47     |
| Co     | -0.73           | -1.06          | -1.08          | 1.39 | 1.34           | 0.39 | 0.36 | 0.28  | 0.31 | 1.62 | -1.35     |
| Fe     | -0.85           | -1.08          | -1.08          | 1.31 | 1.67           | 0.44 | 0.47 | 0.37  | 0.39 | 1.62 | -1.36     |
| Cu     | -0.06           | -1.05          | -1.09          | 2.14 | 0.85           | 0.27 | 0.31 | -0.01 | 0.28 | 1.54 | -0.24     |
| Ga     | -1.02           | -1.14          | -1.09          | 1.21 | 2.10           | 0.60 | 0.52 | 0.51  | 0.46 | 1.59 | -0.52     |
| Al     | -1.51           | -1.29          | -1.10          | 0.87 | 3.93           | 1.16 | 0.93 | 0.88  | 0.96 | 1.59 | -1.15     |

14 \*: The atomic number is shown in Figure R2. M<sub>t</sub> denotes the sum of charges on the four  
 15 metal atoms.

## ADBS relation for monomolecular reactions

Here we show that for a monomolecular reaction, ADBS relation is equivalent to TSS relation. The barrier  $E_a$  is

$$E_a = E_{A/\text{slab}}^{\text{TS}} - E_{A/\text{slab}}^{\text{IS}} \quad (\text{S1})$$

$$E_{A/\text{slab}}^{\text{TS}} = E_A^0 + D_A^{\text{TS}} + E_{\text{slab}}^0 + D_{\text{slab}}^{\text{TS}} + E_{A-\text{slab}}^{\text{TS}} \quad (\text{S2})$$

$$E_{A/\text{slab}}^{\text{IS}} = E_A^0 + D_A^{\text{IS}} + E_{\text{slab}}^0 + D_{\text{slab}}^{\text{IS}} + E_{A-\text{slab}}^{\text{IS}} \quad (\text{S3})$$

For the meaning of all the symbols appearing in this section, please refer to the definitions in "ADBS relation for bimolecular reactions". The adsorption energies of A in the IS and TS,  $E_{\text{ads}}^{\text{IS}}$  and  $E_{\text{ads}}^{\text{TS}}$  are

$$E_{\text{ads}}^{\text{IS}} = (E_{A-\text{slab}}^{\text{IS}} + E_A^0 + D_A^{\text{IS}} + E_{\text{slab}}^0 + D_{\text{slab}}^{\text{IS}}) - (E_A^0 + E_{\text{slab}}^0) = E_{A-\text{slab}}^{\text{IS}} + D_A^{\text{IS}} + D_{\text{slab}}^{\text{IS}} \quad (\text{S4})$$

$$E_{\text{ads}}^{\text{TS}} = (E_{A-\text{slab}}^{\text{TS}} + E_A^0 + D_A^{\text{TS}} + E_{\text{slab}}^0 + D_{\text{slab}}^{\text{TS}}) - (E_A^0 + E_{\text{slab}}^0) = E_{A-\text{slab}}^{\text{TS}} + D_A^{\text{TS}} + D_{\text{slab}}^{\text{TS}} \quad (\text{S5})$$

Substitution of S2 and S3 into S1, one gets

$$E_a = E_{A/\text{slab}}^{\text{TS}} - E_{A/\text{slab}}^{\text{IS}} = (E_{A-\text{slab}}^{\text{TS}} + D_A^{\text{TS}} + D_{\text{slab}}^{\text{TS}}) - (E_{A-\text{slab}}^{\text{IS}} + D_A^{\text{IS}} + D_{\text{slab}}^{\text{IS}}) = E_{A-\text{slab}}^{\text{TS}} - E_{A-\text{slab}}^{\text{IS}} \quad (\text{S6})$$

If ADBS relation holds true for the reaction, then

$$E_a = \alpha E_{\text{ads}}^{\text{IS}} + \beta \quad (\text{S7})$$

From S6 and S7, we have

$$E_{A-\text{slab}}^{\text{TS}} - E_{A-\text{slab}}^{\text{IS}} = \alpha E_{\text{ads}}^{\text{IS}} + \beta \quad (\text{S8})$$

$$E_{\text{ads}}^{\text{TS}} = (\alpha + 1) E_{\text{ads}}^{\text{IS}} + \beta = \alpha' E_{\text{ads}}^{\text{IS}} + \beta \quad (\text{S9})$$

Equation (S9) is TSS relation.

## ADBS relation for bimolecular reactions

Here we show that when certain conditions are satisfied, the ADBS relation for a bimolecular reaction is equivalent to the TSS relation.

The barrier  $E_a$  for a bimolecular surface reaction with reactants A and B is the difference between the total energy of the transition state (TS,  $E_{A+B/\text{slab}}^{\text{TS}}$ ) and initial state (IS,  $E_{A+B/\text{slab}}^{\text{IS}}$ ):

$$E_a = E_{A+B/\text{slab}}^{\text{TS}} - E_{A+B/\text{slab}}^{\text{IS}} \quad (\text{S10})$$

The total energy of IS and TS can be expressed as (S11) and (S12) respectively:

$$E_{A+B/\text{slab}}^{\text{IS}} = E_A^0 + D_A^{\text{IS}} + E_B^0 + D_B^{\text{IS}} + E_{\text{slab}}^0 + D_{\text{slab}}^{\text{IS}} + E_{A-\text{slab}}^{\text{IS}} + E_{B-\text{slab}}^{\text{IS}} + E_{A-B}^{\text{IS}} \quad (\text{S11})$$

$$E_{A+B/\text{slab}}^{\text{TS}} = E_A^0 + D_A^{\text{TS}} + E_B^0 + D_B^{\text{TS}} + E_{\text{slab}}^0 + D_{\text{slab}}^{\text{TS}} + E_{A-\text{slab}}^{\text{TS}} + E_{B-\text{slab}}^{\text{TS}} + E_{A-B}^{\text{TS}} \quad (\text{S12})$$

Here  $E_A^0$ ,  $E_B^0$  and  $E_{\text{slab}}^0$  are the total energies of the isolated A and B and clean slab.  $D_A^{\text{IS}}/D_A^{\text{TS}}$ ,  $D_B^{\text{IS}}/D_B^{\text{TS}}$  and  $D_{\text{slab}}^{\text{IS}}/D_{\text{slab}}^{\text{TS}}$  are the deformation energies of A, B and slab in the IS and TS structures with respect to the isolated A and B and clean slab.

$E_{A-\text{slab}}^{\text{IS}}/E_{A-\text{slab}}^{\text{TS}}$ ,  $E_{B-\text{slab}}^{\text{IS}}/E_{B-\text{slab}}^{\text{TS}}$  and  $E_{A-B}^{\text{IS}}/E_{A-B}^{\text{TS}}$  refer to the interaction energy between A

1 or B and slab and between A and B in the IS/TS structures. Fig. S10 illustrates the  
 2 deformation energy and interaction energy. Substitution of (S14) and (S12) into (S10)  
 3 yields equation (S13)

$$4 \quad E_a = (D_A^{TS} - D_A^{IS}) + (D_B^{TS} - D_B^{IS}) + (D_{slab}^{TS} - D_{slab}^{IS}) + (E_{A-slab}^{TS} - E_{A-slab}^{IS}) + (E_{B-slab}^{TS} - E_{B-slab}^{IS}) + (E_{A-B}^{TS} - E_{A-B}^{IS})$$

5 (S13)

6 In our case, the two reactants are CO<sub>2</sub> and H atom. Let B represent H atom, we have

7  $D_B^{IS} = D_B^{TS} = 0$ . Rearranging (6), we obtain equation (S14):

$$8 \quad E_a = (E_{A-B}^{TS} + E_{A-slab}^{TS} + D_A^{TS}) - (E_{A-B}^{IS} + E_{A-slab}^{IS} + D_A^{IS}) + (E_{B-slab}^{TS} + D_{slab}^{TS}) - (E_{B-slab}^{IS} + D_{slab}^{IS})$$

9 (S14)

$$10 \quad = (E_{A-B}^{TS} + E_{A-slab}^{TS} + D_A^{TS}) - (E_{A-B}^{IS} + E_{A-slab}^{IS} + D_A^{IS}) + (E_{slab}^0 + E_B^0 + E_{B-slab}^{TS} + D_{slab}^{TS})$$

11 - (E\_{slab}^0 + E\_B^0 + E\_{B-slab}^{IS} + D\_{slab}^{IS})

12 (S14')

11 Note  $(E_{slab}^0 + E_B^0 + E_{B-slab}^{TS} + D_{slab}^{TS})$  and  $(E_{slab}^0 + E_B^0 + E_{B-slab}^{IS} + D_{slab}^{IS})$  denote the total energies  
 12 of the slab with species B on it in the TS and IS respectively. When they are equal,  
 13 equation (S14') is reduced to (S15):

$$14 \quad E_a' = (E_{A-B}^{TS} + E_{A-slab}^{TS} + D_A^{TS}) - (E_{A-B}^{IS} + E_{A-slab}^{IS} + D_A^{IS})$$

15 (S15)

15  $E_a'$  indicates the barrier under the condition that  $(E_{slab}^0 + E_B^0 + E_{B-slab}^{TS} + D_{slab}^{TS})$  equals to  
 16  $(E_{slab}^0 + E_B^0 + E_{B-slab}^{IS} + D_{slab}^{IS})$ . It can be shown that equation (S15) is the difference of  
 17 adsorption energy of reactant A,  $E_{ads(A)}$ , on the slab with B adsorbed on it in the TS and IS  
 18 structures. Take  $E_{ads(A)}$  for the IS as an example:

$$19 \quad E_{ads(A)}^{IS} = (E_{A-slab}^{IS} + E_{B-slab}^{IS} + E_{A-B}^{IS} + E_A^0 + D_A^{IS} + E_B^0 + D_B^{IS} + E_{slab}^0 + D_{slab}^{IS}) - (E_{B-slab}^{IS} + E_A^0 + E_B^0 + D_B^{IS} +$$

20  $E_{slab}^0 + D_{slab}^{IS}) = E_{A-B}^{IS} + E_{A-slab}^{IS} + D_A^{IS}$  (S16)

21 With equation (S16), (S15) can be expressed as (S17)

$$22 \quad E_a' = E_{ads(A)}^{TS} - E_{ads(A)}^{IS}$$

23 (S17)

23 Equation (S17) shows that for bimolecular reactions, as long as one of the reactants  
 24 has no deformation energy and  $(E_{slab}^0 + E_B^0 + E_{B-slab}^{TS} + D_{slab}^{TS})$  and  $(E_{slab}^0 + E_B^0 + E_{B-slab}^{IS} + D_{slab}^{IS})$   
 25 are equal, the barrier is apparently related to the other reactant only. In our case,  
 26 deformation energy of H is strictly zero. The assumption that  $(E_{slab}^0 + E_B^0 + E_{B-slab}^{TS} + D_{slab}^{TS})$   
 27 equals to  $(E_{slab}^0 + E_B^0 + E_{B-slab}^{IS} + D_{slab}^{IS})$  is a strong condition.

$$28 \quad \text{Let } \Delta E = [(E_{slab}^0 + E_B^0 + E_{B-slab}^{TS} + D_{slab}^{TS}) - (E_{slab}^0 + E_B^0 + E_{B-slab}^{IS} + D_{slab}^{IS})]$$

29 (S18)

29  $\Delta E$  in S18 is in fact the energy difference of the slab with B on it in the TS and the IS.  
 30 For the twelve systems studied in the present paper the average absolute value of  $\Delta E$   
 31 is 0.28 eV which is close to the DFT accuracy. The small  $\Delta E$  explains the existence of  
 32 ADBS relation for the systems. Generally,  $\Delta E$  is not zero. From (S14'), (S17) and (S18),  
 33 the general expression for barrier  $E_a$  is

1 
$$E_a = E_{\text{ads}(A)}^{\text{TS}} - E_{\text{ads}(A)}^{\text{IS}} + \Delta E = E_a' + \Delta E \quad (\text{S19})$$

2 Table S5 lists the values for  $E_{\text{ads}(A)}^{\text{TS}}$ ,  $E_{\text{ads}(A)}^{\text{IS}}$ ,  $\Delta E$  and  $E_a'$ . The averaged absolute  $E_{\text{ads}(A)}^{\text{IS}}$   
 3 is more than three time as large as  $E_{\text{ads}(A)}^{\text{TS}}$  and there is a linear relation between  
 4  $E_{\text{ads}(A)}^{\text{IS}}$  and  $E_a'$ , as shown by equation (20) and Figure S9:

5 
$$E_a' = -0.919 \times E_{\text{ads}(A)}^{\text{IS}} + 0.230 \quad R^2 = 0.87 \quad (\text{S20})$$

6 The deviation of  $\text{Co}_4/\text{In}_2\text{O}_3$  system from the fitted line in Figure S9 is due to large  
 7 value of  $\Delta E$  (see Table S5).

8

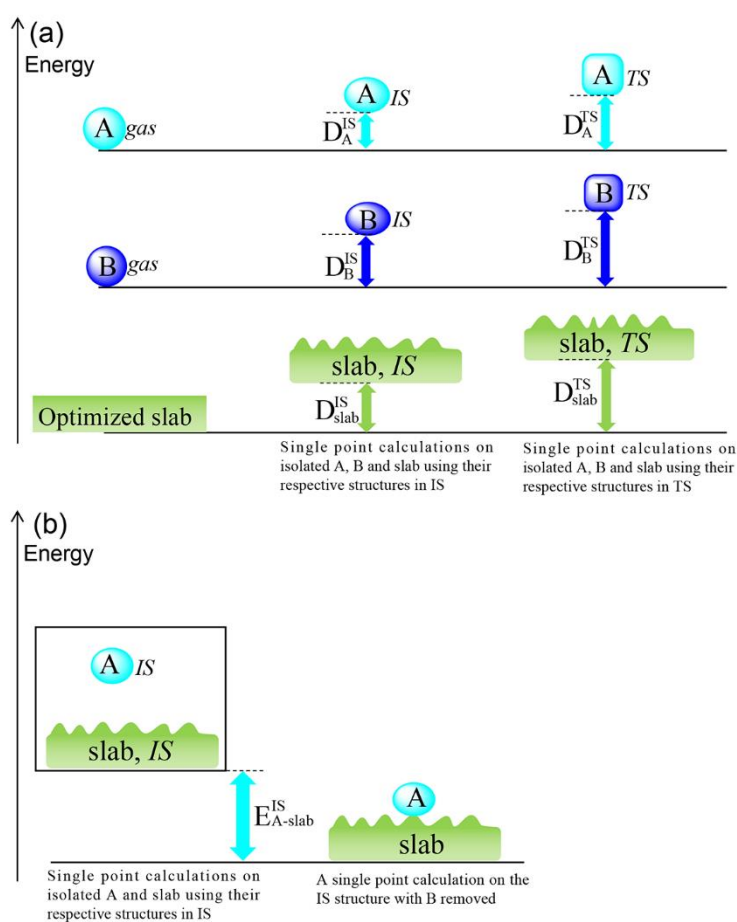

9

10 **Fig. S10** Illustration of (a) the deformation energy and (b) the interaction energy.

11

12 **Table S5.** Adsorption energies  $E_{\text{ads}}$  of A ( $\text{CO}_2$ ) with slab plus B (H) in the initial state (IS) and  
 13 transition state (TS), the energy difference  $E_a'$  between  $E_{\text{ads}(A)}^{\text{TS}}$  and  $E_{\text{ads}(A)}^{\text{IS}}$ ,  $\Delta E$ , and the  
 14 calculated barrier  $E_a$ .

| Systems                             | $E_{\text{ads}(A)}^{\text{IS}}$ | $E_{\text{ads}(A)}^{\text{TS}}$ | $E_a'$ | $\Delta E$ | $E_a' + \Delta E$ | $E_a$ |
|-------------------------------------|---------------------------------|---------------------------------|--------|------------|-------------------|-------|
| $\text{Ag}_4/\text{In}_2\text{O}_3$ | -0.23                           | -0.07                           | 0.16   | 0.24       | 0.40              | 0.40  |
| $\text{Pt}_4/\text{In}_2\text{O}_3$ | -0.98                           | -0.33                           | 0.65   | -0.11      | 0.54              | 0.55  |
| $\text{Pd}_4/\text{In}_2\text{O}_3$ | -0.94                           | -0.38                           | 0.56   | 0.28       | 0.84              | 0.84  |
| $\text{Rh}_4/\text{In}_2\text{O}_3$ | -1.61                           | -0.06                           | 1.55   | -0.68      | 0.87              | 0.87  |
| $\text{Ir}_4/\text{In}_2\text{O}_3$ | -1.21                           | -0.07                           | 1.14   | -0.10      | 1.04              | 1.05  |

|                                                 |       |       |      |       |      |      |
|-------------------------------------------------|-------|-------|------|-------|------|------|
| Ni <sub>4</sub> /In <sub>2</sub> O <sub>3</sub> | -0.71 | -0.09 | 0.62 | 0.30  | 0.92 | 0.92 |
| Cr <sub>4</sub> /In <sub>2</sub> O <sub>3</sub> | -1.53 | -0.40 | 1.13 | 0.11  | 1.24 | 1.24 |
| Fe <sub>4</sub> /In <sub>2</sub> O <sub>3</sub> | -1.36 | 0.01  | 1.37 | -0.25 | 1.12 | 1.12 |
| Co <sub>4</sub> /In <sub>2</sub> O <sub>3</sub> | -1.42 | -1.38 | 0.04 | 0.98  | 1.02 | 1.02 |
| Al <sub>4</sub> /In <sub>2</sub> O <sub>3</sub> | -1.00 | -0.33 | 0.67 | 0.16  | 0.83 | 0.84 |
| Ga <sub>4</sub> /In <sub>2</sub> O <sub>3</sub> | -0.78 | -0.41 | 0.37 | 0.01  | 0.38 | 0.38 |
| Cu <sub>4</sub> /In <sub>2</sub> O <sub>3</sub> | -0.25 | -0.04 | 0.21 | 0.21  | 0.42 | 0.42 |

1  
2  
3

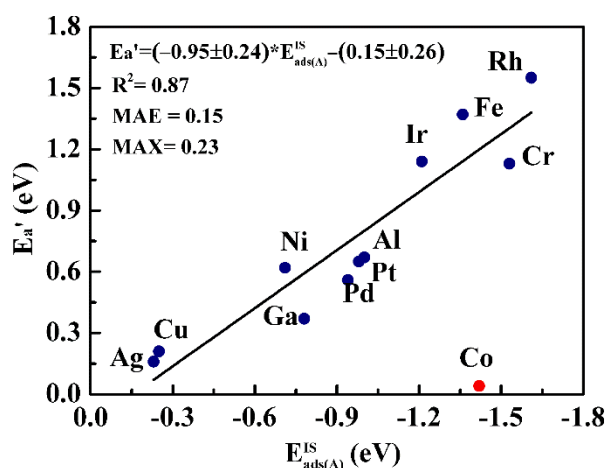

4  
5  
6  
7  
8

**Fig. S11** Linear scaling correlation between the adsorption energy of A (CO<sub>2</sub>) on the slab with H adsorbed on it and energy barrier  $E_a'$  for CO<sub>2</sub> hydrogenation to HCOO step.

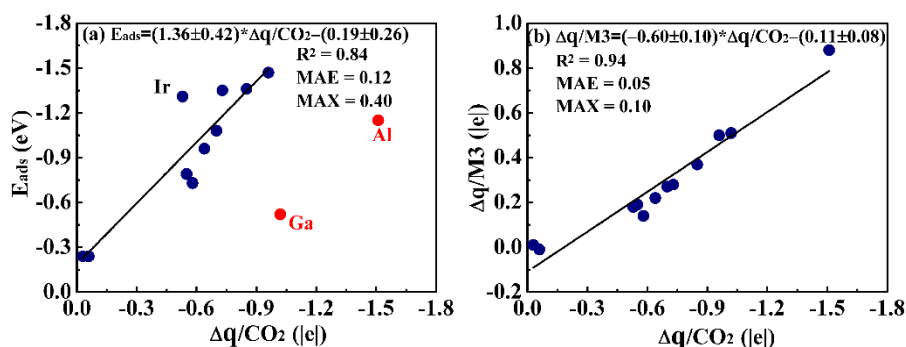

9

**Fig. S12** (a) Correlation between the Bader charges  $\Delta q$  of the CO<sub>2</sub>\* species and the CO<sub>2</sub> adsorption energies ( $E_{ads}$ ), and (b) linear scaling correlation between the Bader charges  $\Delta q$  of the CO<sub>2</sub>\* species and the Bader charges  $\Delta q$  of the M3 atom (see Fig.S13 for M3). The positive/negative value of  $\Delta q$  indicates electron elimination/accumulation, where M = Ag, Pt, Pd, Rh, Ni, Ir, Cr, Co, Fe, Cu, Ga and Al.

15  
16

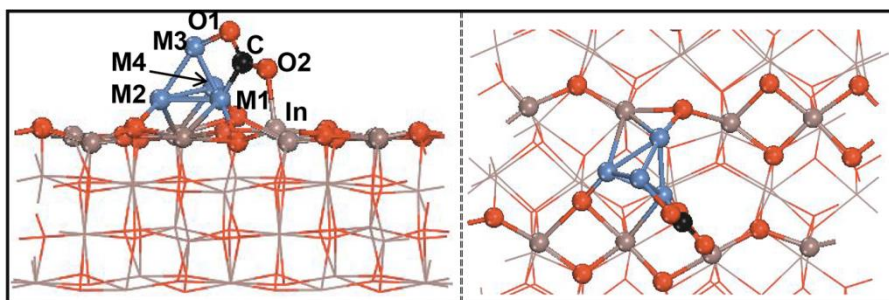

1

2 **Fig. S13** Optimized adsorbed structure of CO<sub>2</sub> molecular on M<sub>4</sub>/In<sub>2</sub>O<sub>3</sub> surface, where M = Ag,  
 3 Pt, Pd, Rh, Ni, Ir, Cr, Co, Fe, Cu, Ga and Al.

4

5

6

7

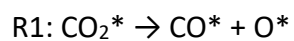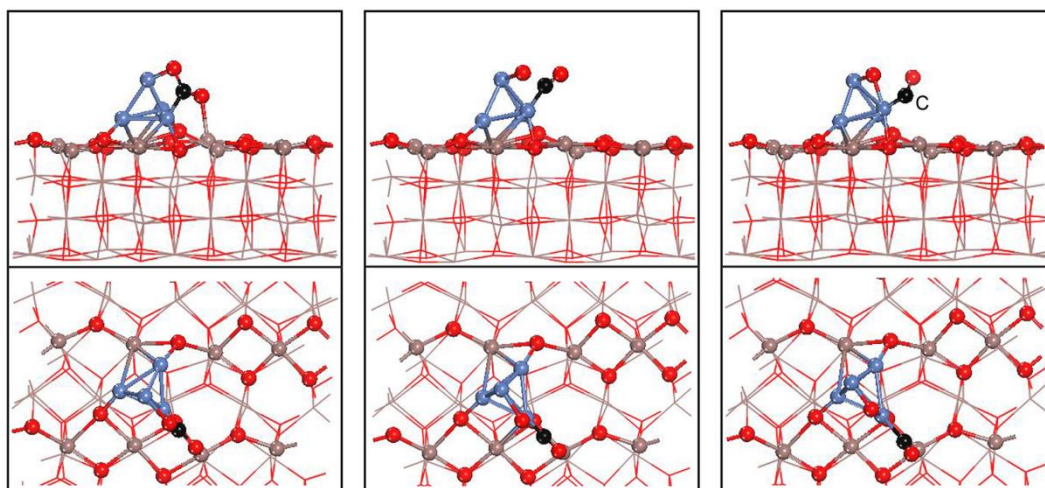

8

9

10

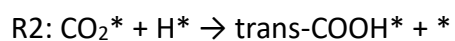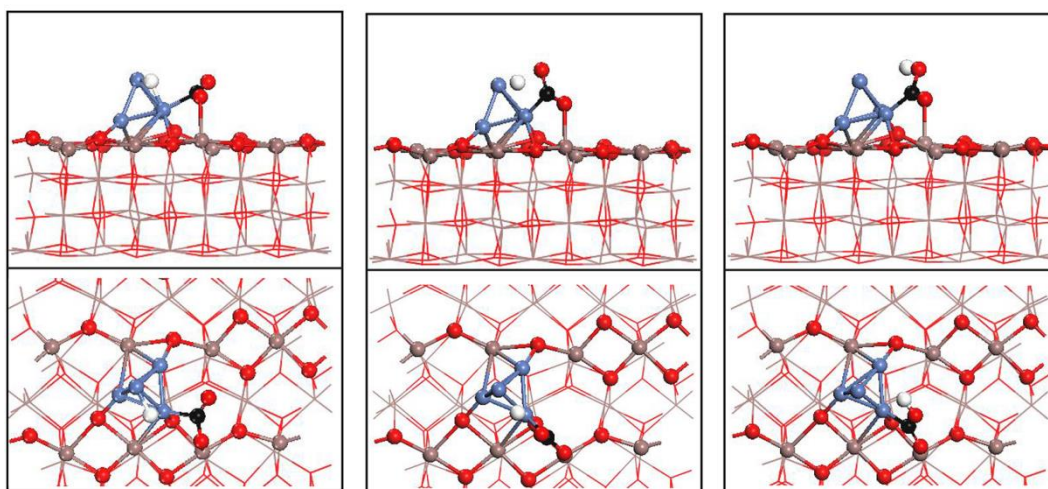

11

1

2

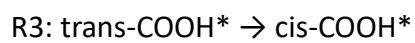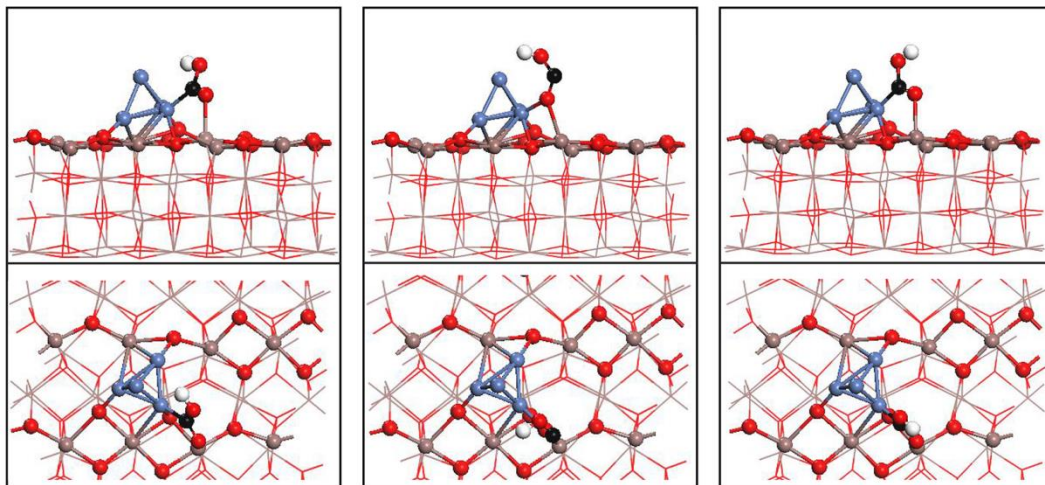

3

4

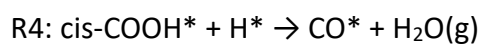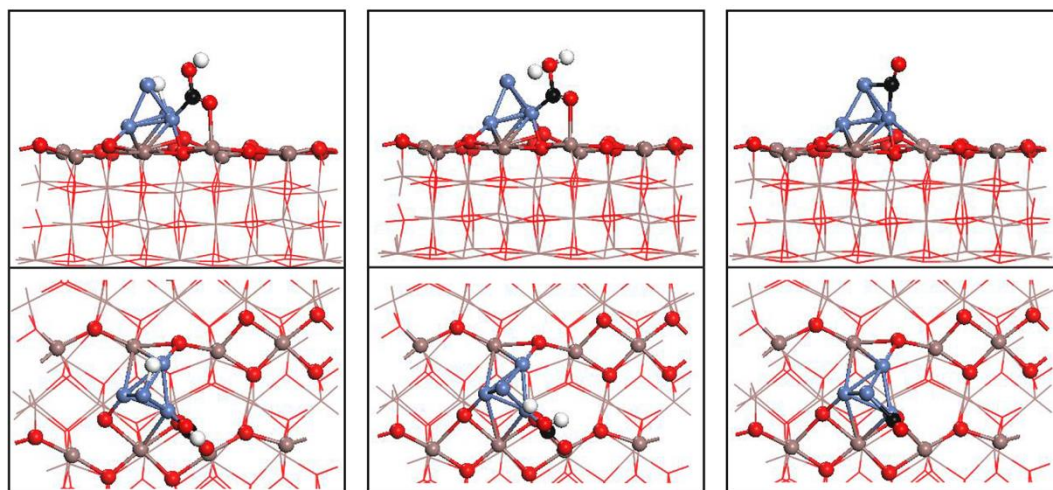

5

6

7

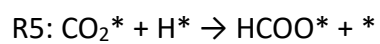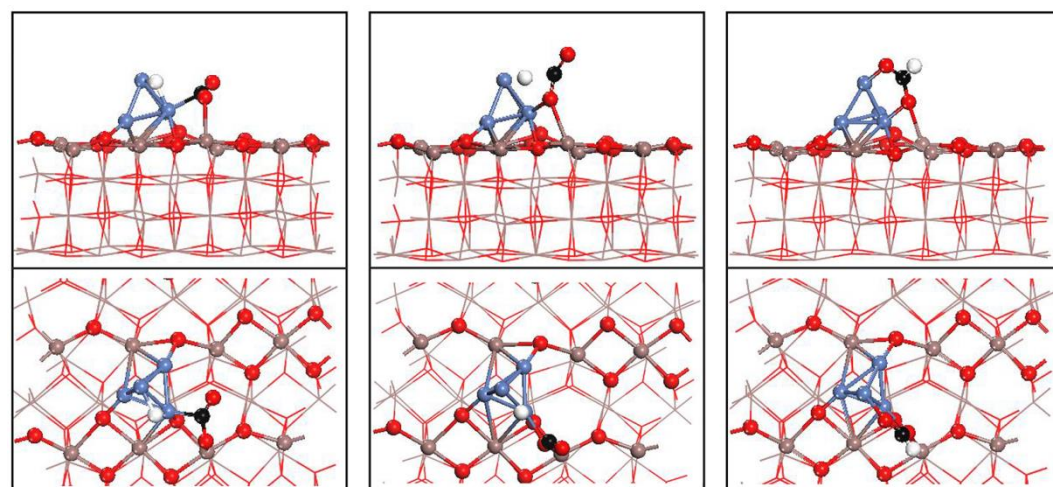

8

9

10

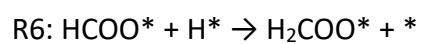

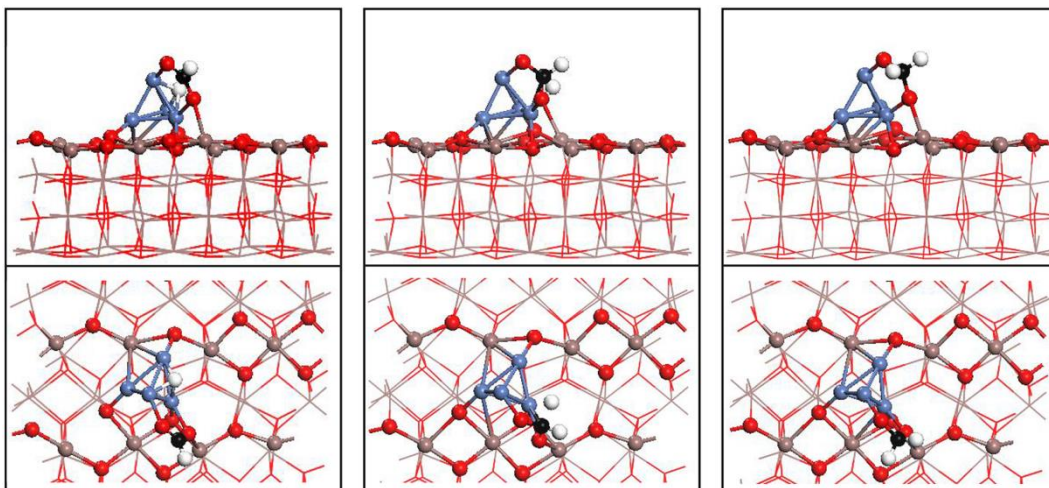

1  
2  
3  
4

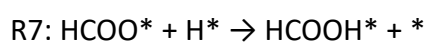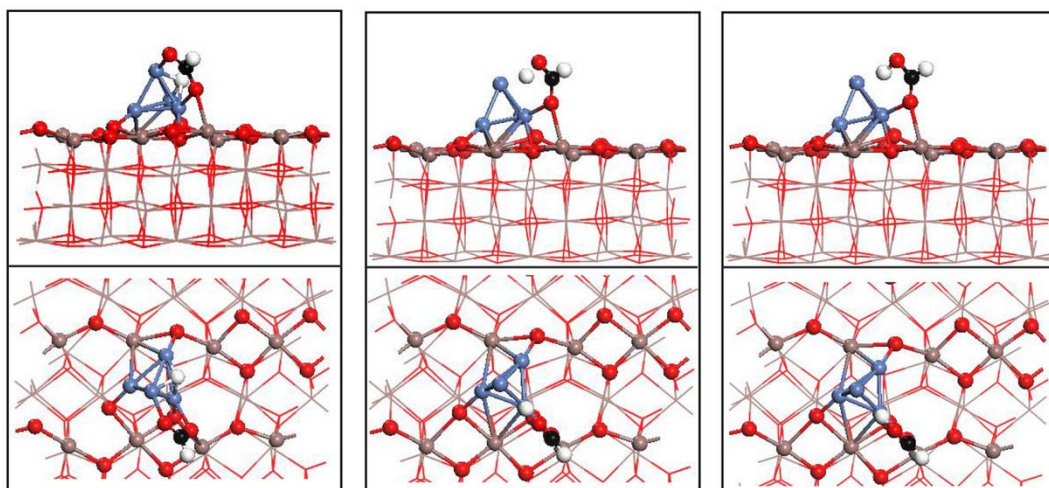

5  
6  
7  
8

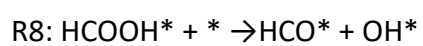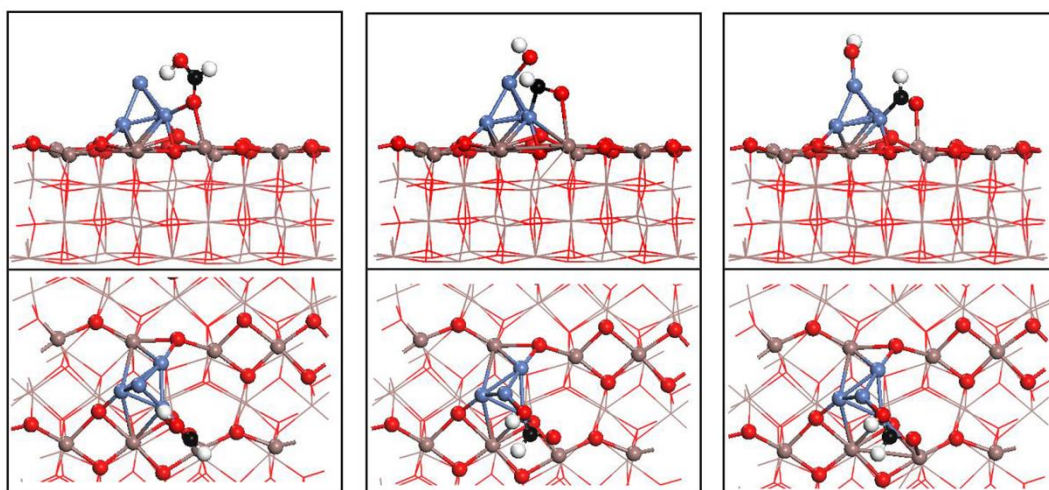

9  
10



1

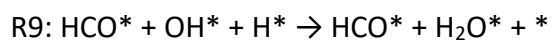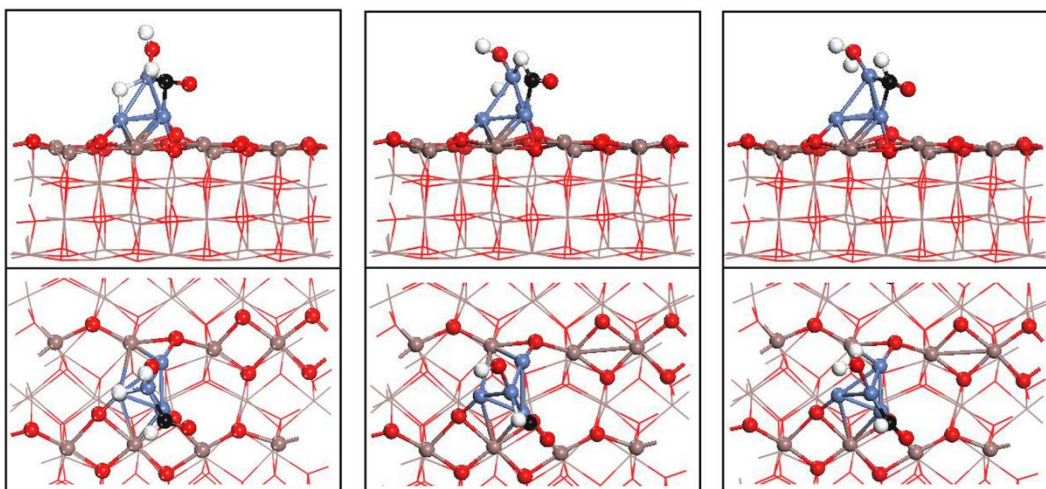

2

3

4

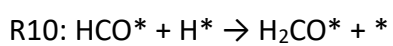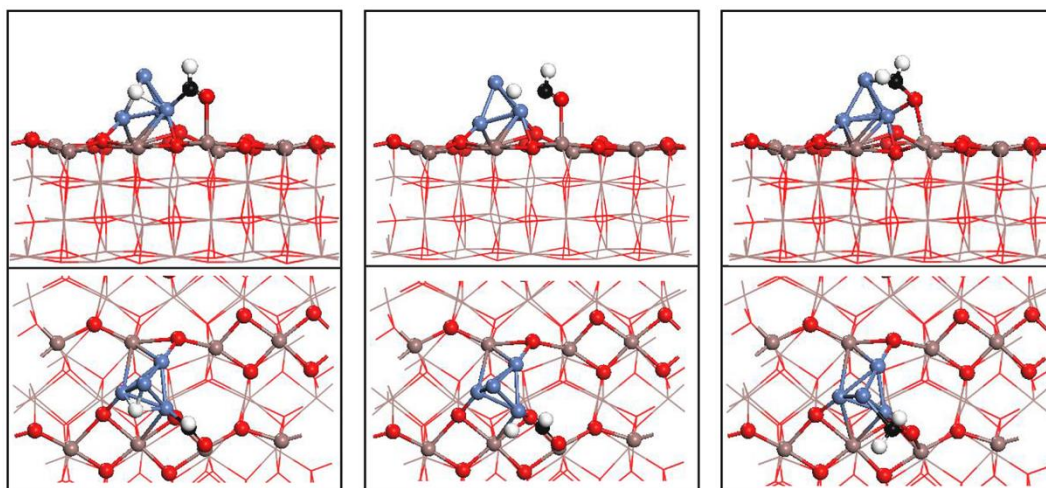

5

6

7

8

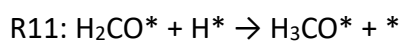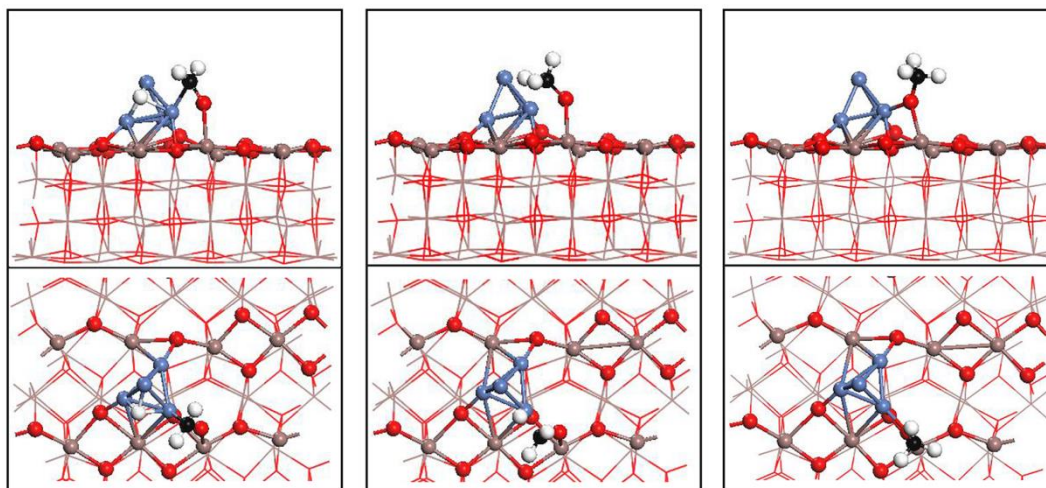

9

10

1

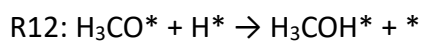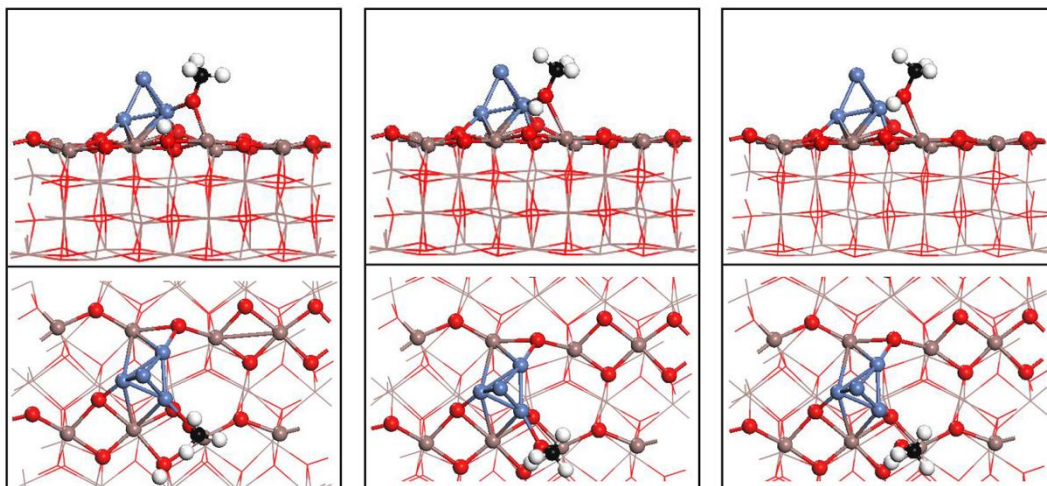

2

3

4

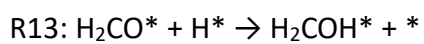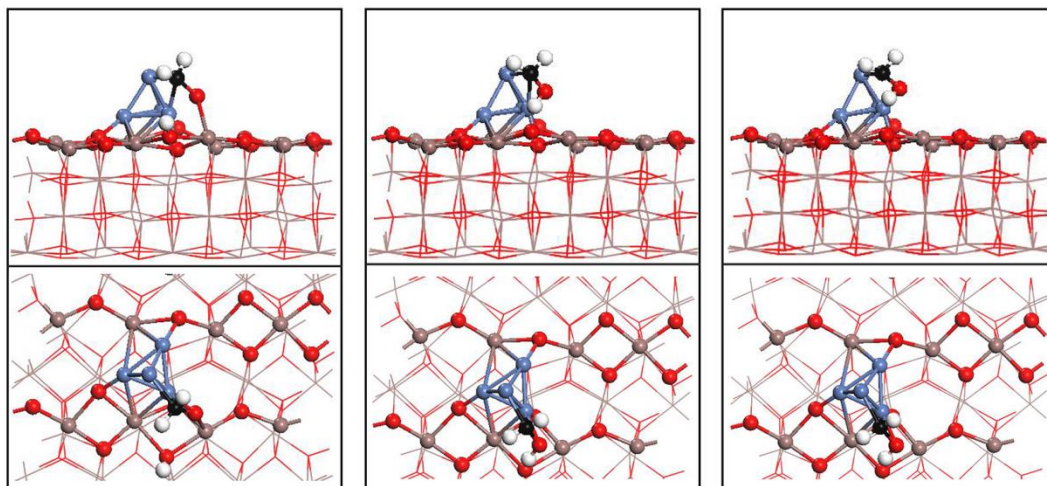

5

6

7

8

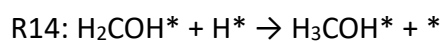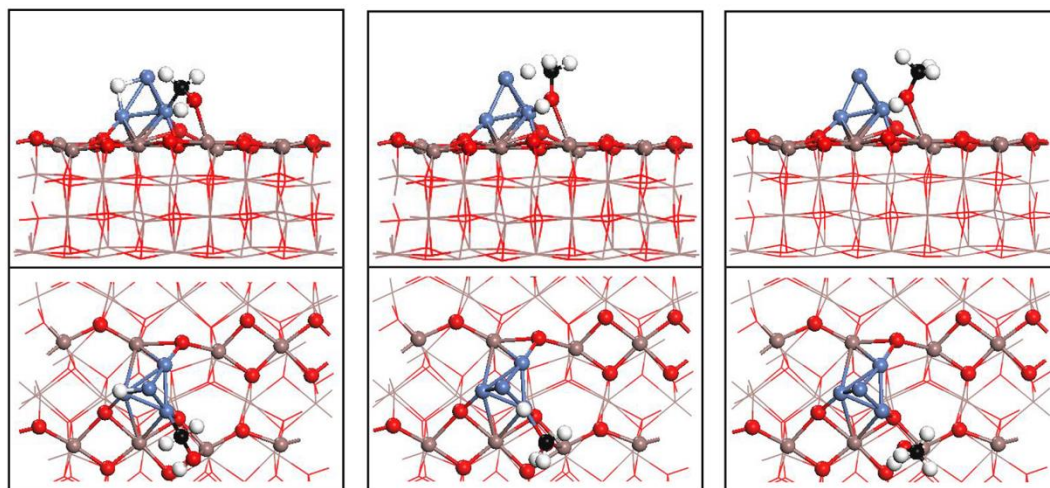

9

10

1 **Fig. S14** Illustration of the initial state (left panels), transition state (middle panels) and final state (right panels) for each of elementary steps over  $\text{Ni}_4/\text{In}_2\text{O}_3(110)$ . Red, O atoms; black, C  
2 atoms; white, H atoms; Brown, In atoms; Blue, Ni atoms.  
3

4  
5  
6  
7  
8  
9  
10  
11  
12  
13  
14

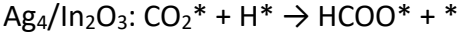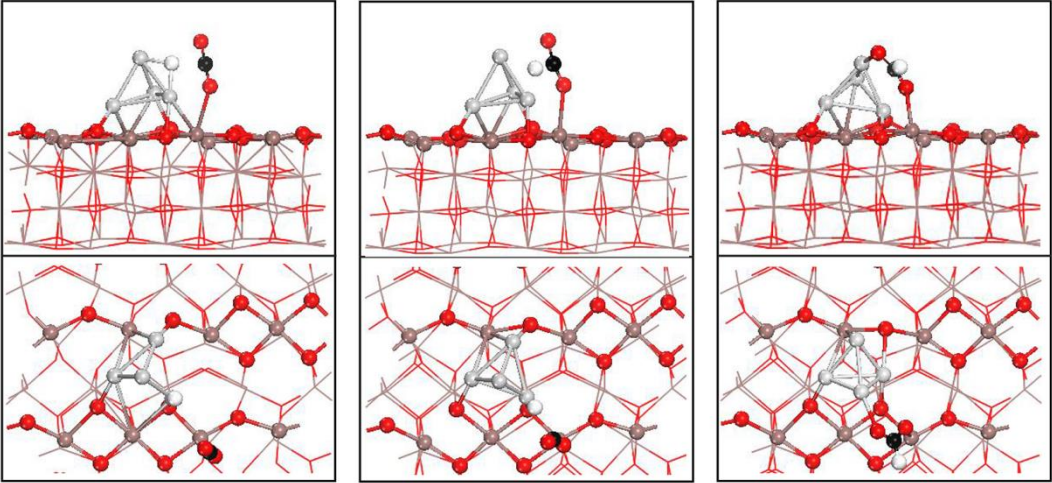

15  
16

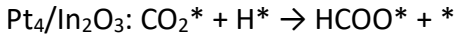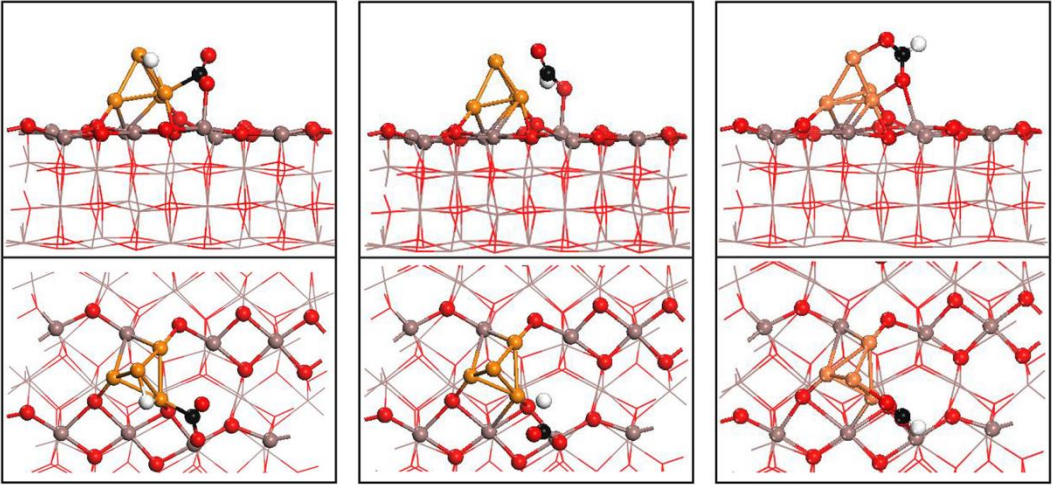

17  
18  
19

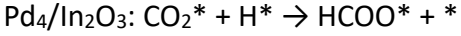

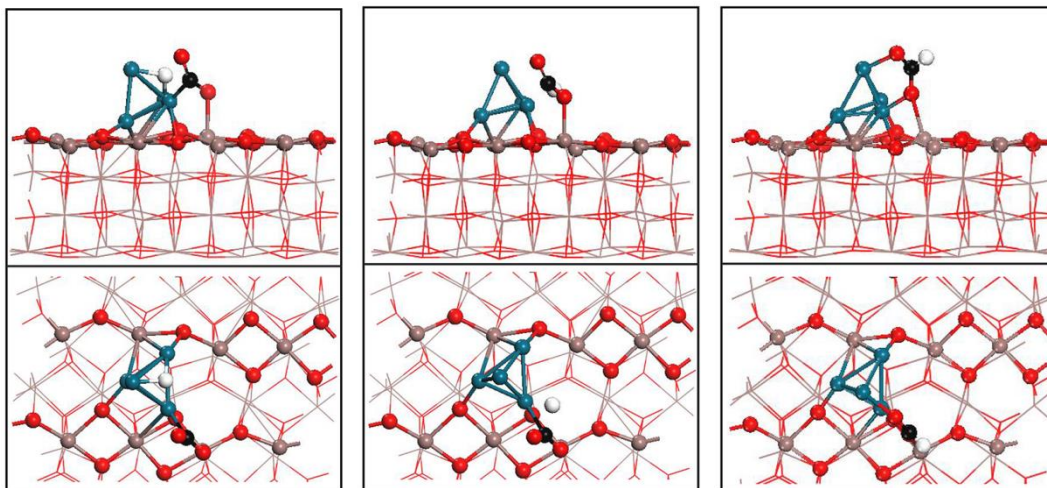

1

2

3

4

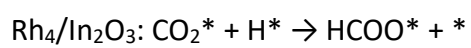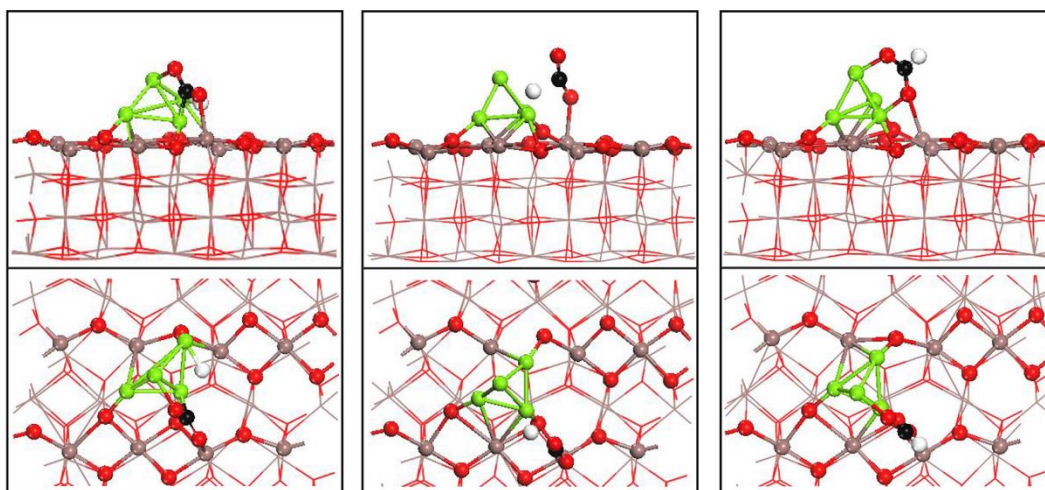

5

6

7

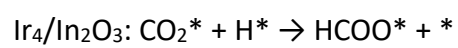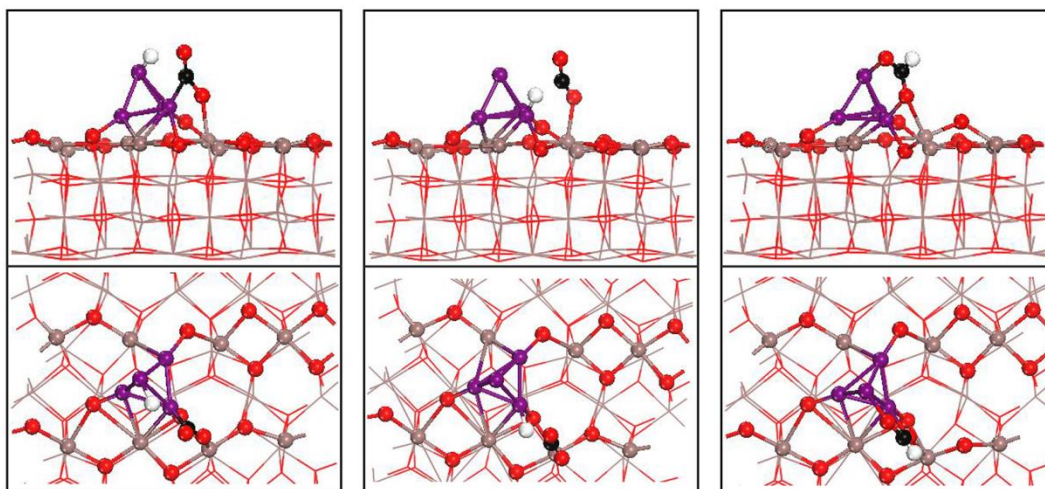

8

9

1

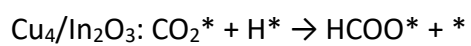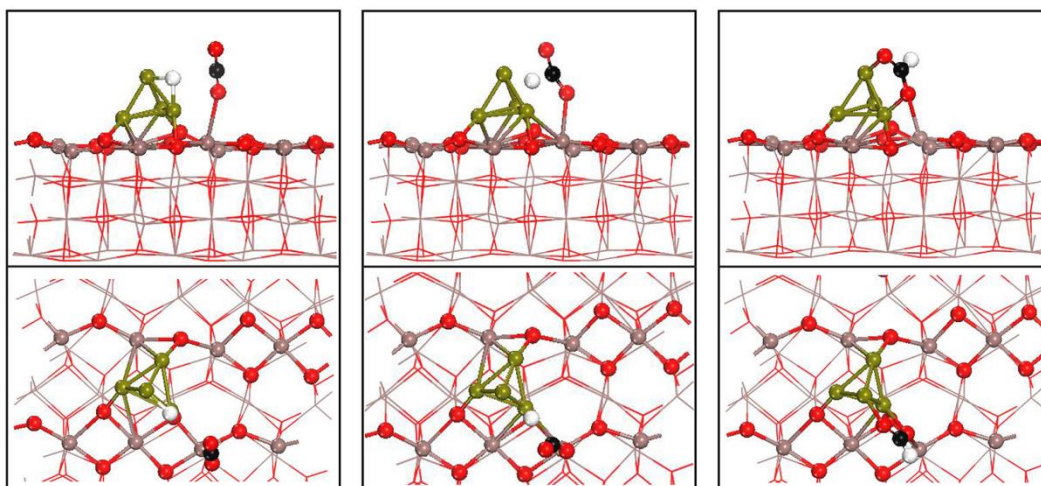

2

3

4

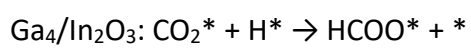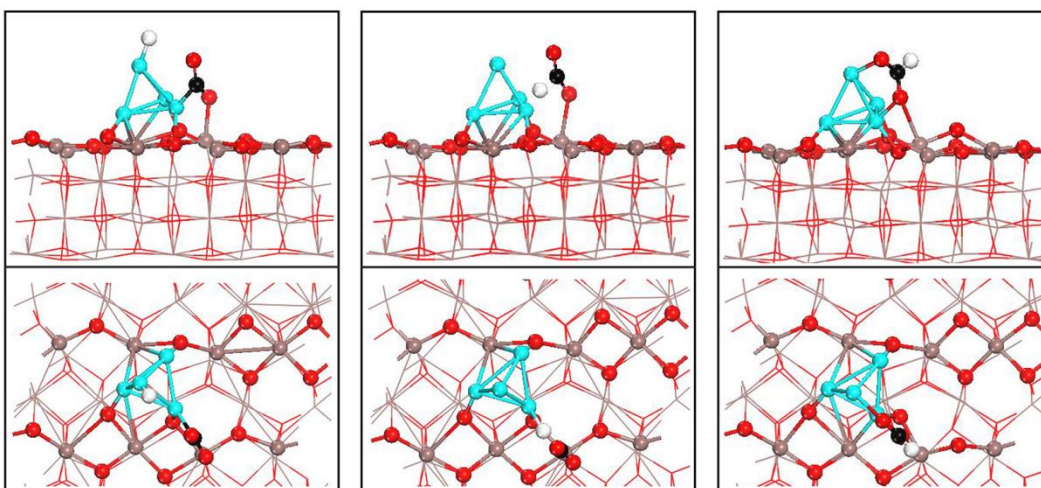

5

6

7

8

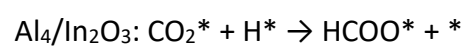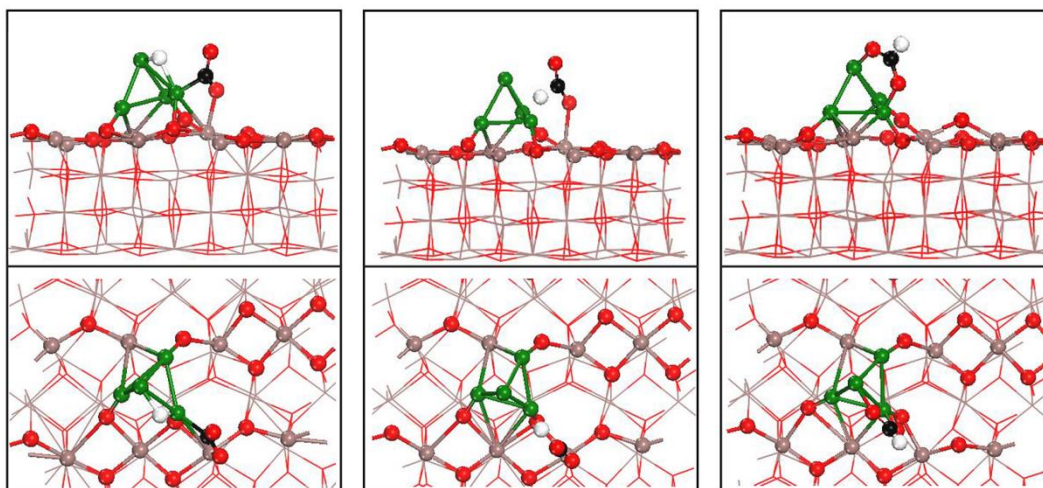

9

10

1

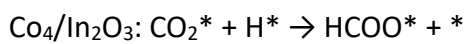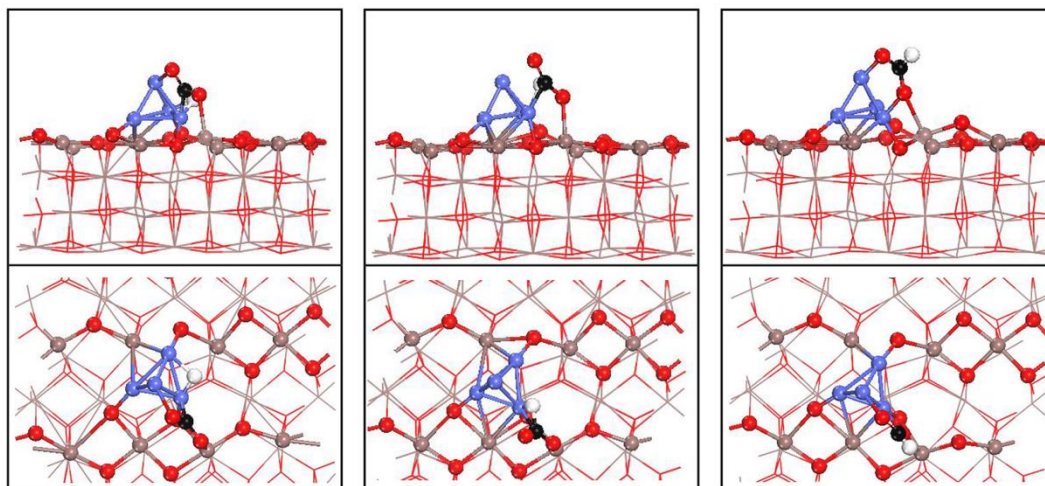

2

3

4

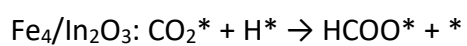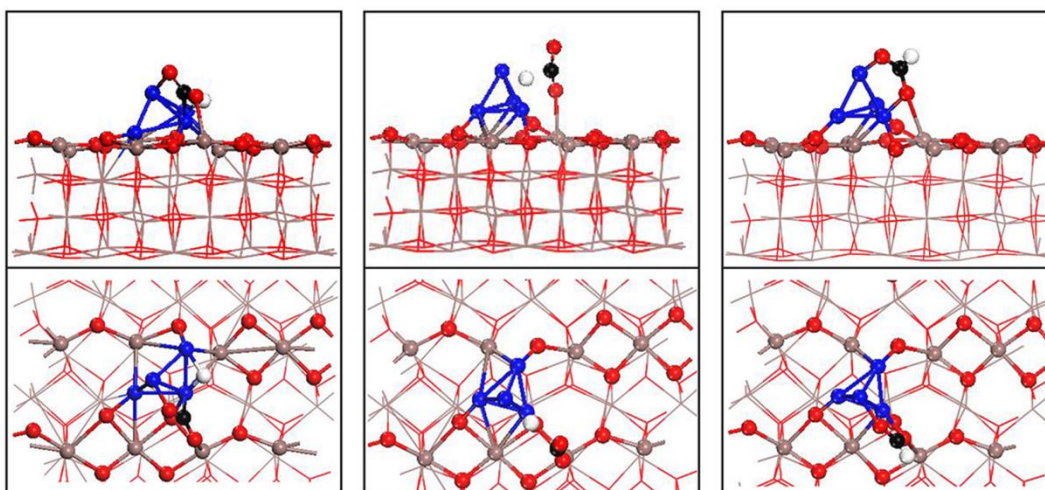

5

6

7

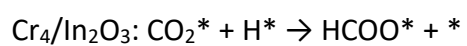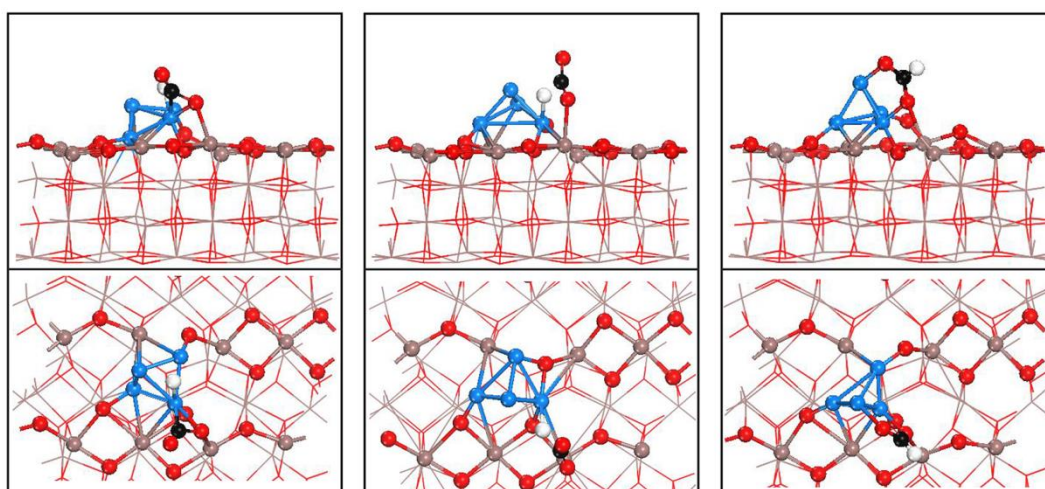

8

9

10 **Fig. S15** Illustration of the initial state (left panels), transition state (middle panels) and final

1 state (right panels) for  $\text{CO}_2^* + \text{H}^* \rightarrow \text{HCOO}^* + *$  step over  $\text{M}_4/\text{In}_2\text{O}_3(110)$ , where M = Ag, Pt,  
2 Pd, Rh, Ir, Cu, Ga, Al, Co, Fe and Cr, respectively.

3

4

5 **Reference:**

6 [S1] (a) J. Ye, C. Liu, D. Mei and Q. Ge, *J. Catal.*, 2014, **317**, 44–53; (b) N. Rui, K. Sun, C. Shen  
7 and C. Liu, *J. CO<sub>2</sub> Util.*, 2020, **42**, 101313; (c) K. Sun, N. Rui, C. Shen and C. Liu, *J. Phys.*  
8 *Chem. C*, 2021, **125**, 10926–10936; (d) X. Wang, J. Pan, H. Wei, W. Li, J. Zhao and Z. Hu,  
9 *Phys. Chem. Chem. Phys.*, 2021, **23**, 11557–11567; (e) C. Shen, Q. Bao, W. Xue, K. Sun, Z.  
10 Zhang, X. Jia, D. Mei and C. Liu, *J. Energy Chem.*, 2022, **65**, 623–629.

11 [S2] M. Marezio, *Acta Cryst.*, 1966, **20**, 723–728.

12 [S3] (a) G. Kresse, J. Hafner, *Phys. Rev. B: Condens. Matter Mater. Phys.*, 1993, **47**,  
13 558–561; (b) G. Kresse and J. Furthmüller, *Phys. Rev. B: Condens. Matter Mater.*  
14 *Phys.*, 1996, **54**, 11169–11186; (c) G. Kresse and J. Furthmüller, *Comput. Mater.*  
15 *Sci.*, 1996, **6**, 15–50.

16 [S4] (a) G. Kresse and D. Joubert, *Phys. Rev. B: Condens. Matter Mater. Phys.*, 1999, **59**,  
17 1758–1775; (b) P. E. Blöchl, *Phys. Rev. B: Condens. Matter Mater. Phys.*, 1994, **50**,  
18 17953–17979.

19 [S5] J. P. Perdew, K. Burke and M. Ernzerhof, *Phys. Rev. Lett.*, 1996, **77**, 3865–3868.

20 [S6] (a) S. Grimme, S. Ehrlich and L. Goerigk, *J. Comput. Chem.*, 2011, **32**, 1456–1465; (b) S.  
21 Grimme, J. Antony, S. Ehrlich and H. Krieg, *J. Chem. Phys.*, 2010, **132**, No. 154104.

22 [S7] (a) H. J. Monkhorst and J. D. Pack, *Phys. Rev. B*, 1976, **13**, 5188–5192; (b) G. Henkelman,  
23 B. P. Uberuaga, H. Jónsson, *J. Chem. Phys.*, 2000, **113**, 9901–9904.

24 [S8] G. Henkelman and H. Jónsson, *J. Chem. Phys.*, 2000, **113**, 9978–9985.

25 [S9] P. Hänggi, P. Talkner and M. Borkovec, *Reviews of modern physics*, 1990, **62**, 251–341.

26 [S10] A. P. J. Jansen, *An Introduction to Kinetic Monte Carlo Simulations of Surface Reactions*;  
27 *Springer: Berlin, Heidelberg*, 2012.

28 [S11] C. A. Wolcott, A. J. Medford, F. Studt, C. T. Campbell, *J. Catal.* **2015**, **330**, 197–207.

29 [S12] K. Sun, Z. Zhang, C. Shen, N. Rui and C. Liu, *Green Energy Environ.*, 2021, **7**, 807–817.

30 [S13] N. Rui, Z. Wang, K. Sun, J. Ye, Q. Ge and C. Liu, *Appl. Catal. B*, 2017, **218**, 488–497.

31 [S14] J. Wang, K. Sun, X. Jia and C. Liu, *Catal. Today*, 2020, **365**, 341–347.

32 [S15] C. Shen, K. Sun, Z. Zhang, N. Rui, X. Jia, D. Mei and C. Liu, *ACS Catal.*, 2021, **11**,  
33 4036–4046.

34 [S16] X. Jia, K. Sun, J. Wang, C. Shen and C. Liu, *J. Energy Chem.*, 2020, **50**, 409–415.

35 [S17] K. Sun, N. Rui, Z. Zhang, Z. Sun, Q. Ge and C. Liu, *Green Chem.*, 2020, **22**, 5059–5066.

36

1  
2
